# Supplementary material for: Molybdenum carbide catalyst for the reduction of CO2 to CO: surface science aspects by NAPPES and catalysis studies
Source: Royal Society of Chemistry journal article supplement (doi:10.1039/c9dt01774g), 2019-01-01
Supplement: c9dt01774g1.pdf [file c9dt01774g1.pdf]

**Molybdenum Carbide Catalyst for the Reduction of CO<sub>2</sub> to CO: Surface Science Aspects by NAPPES and Catalysis Studies.**

*Kasala Prabhakar Reddy,<sup>a,b</sup> Srikanth Dama,<sup>a,b</sup> Nitin B. Mhamane,<sup>a,b</sup> Manoj K. Ghosal,<sup>a,b</sup> Thirumalaiswamy Raja,<sup>a,b</sup> Chilukuri V. Satyanarayana,<sup>a,b</sup> and Chinnakonda S. Gopinath\*<sup>a,b,c</sup>*

**Electronic Supplementary Information (ESI)**

Conversion and Selectivity calculation:

**CO<sub>2</sub> Conversion:**

$$X_{\text{CO}_2} \% = \frac{\text{Moles CO}_2 \text{ in} - \text{Moles CO}_2 \text{ out}}{\text{Moles CO}_2 \text{ in}} \times 100$$

**H<sub>2</sub> Conversion**

$$X_{\text{H}_2} \% = \frac{\text{Moles H}_2 \text{ in} - \text{Moles H}_2 \text{ out}}{\text{Moles H}_2 \text{ in}} \times 100$$

**CO Selectivity:**

$$S_{\text{CO}} \% = \frac{\text{Moles CO out}}{\text{Moles CO out} + \text{Moles CH}_4 \text{ out}} \times 100$$

**CH<sub>4</sub> Selectivity:**

$$S_{\text{CH}_4} \% = \frac{\text{Moles CH}_4 \text{ out}}{\text{Moles CO out} + \text{Moles CH}_4 \text{ out}} \times 100$$

**Table S1:** Physiochemical properties of as synthesized  $\beta$ -Mo<sub>2</sub>C.

| BET Surface Area (m <sup>2</sup> /g) | Total Pore Volume (cc/g) | Average pore diameter (nm) |
|--------------------------------------|--------------------------|----------------------------|
| 11.6                                 | 0.0124                   | 4.2                        |

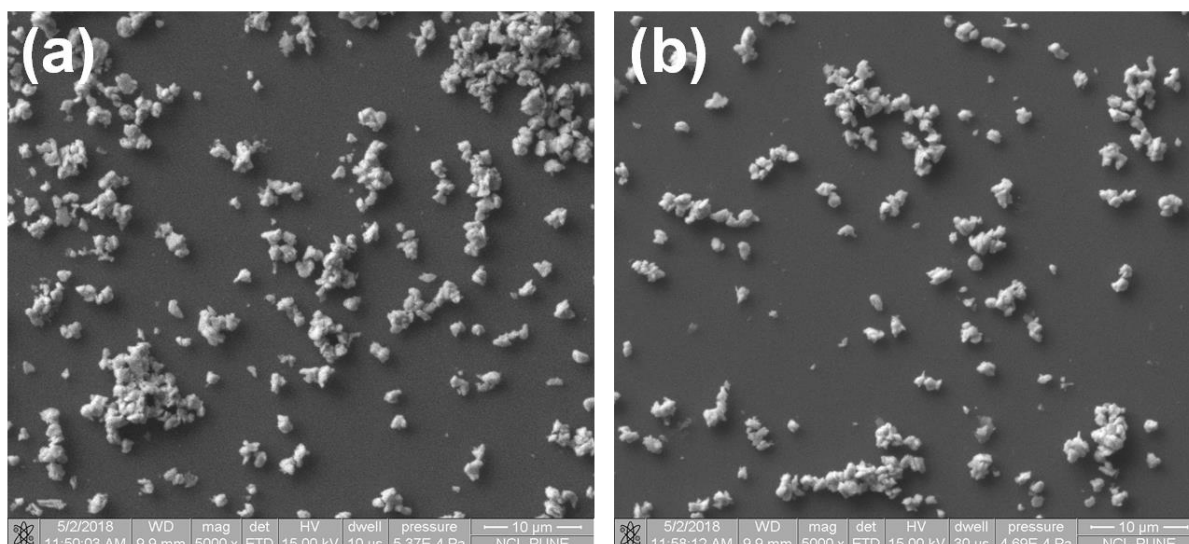

**Figure S1.** Scanning Electron Microscopy (SEM) images of synthesized  $\text{Mo}_2\text{C}$  powder catalyst a) Before b) After reaction  $\text{CO}_2$  hydrogenation reaction.

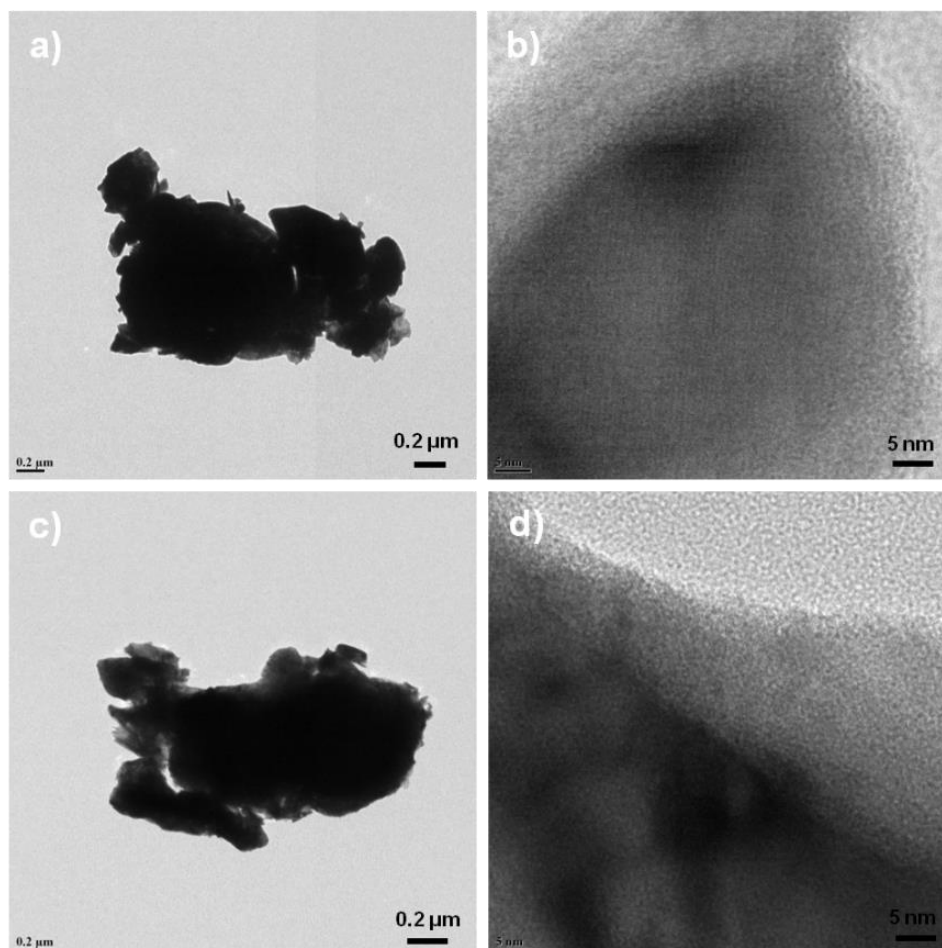

**Figure S2.** Transmission Electron Microscopy (TEM) and HRTEM images of (a-b) as-synthesized  $\text{Mo}_2\text{C}$  powder catalyst, and, (c-d) after  $\text{CO}_2$  hydrogenation reaction. Surface texture and particle size remains the same for fresh and spent catalysts.

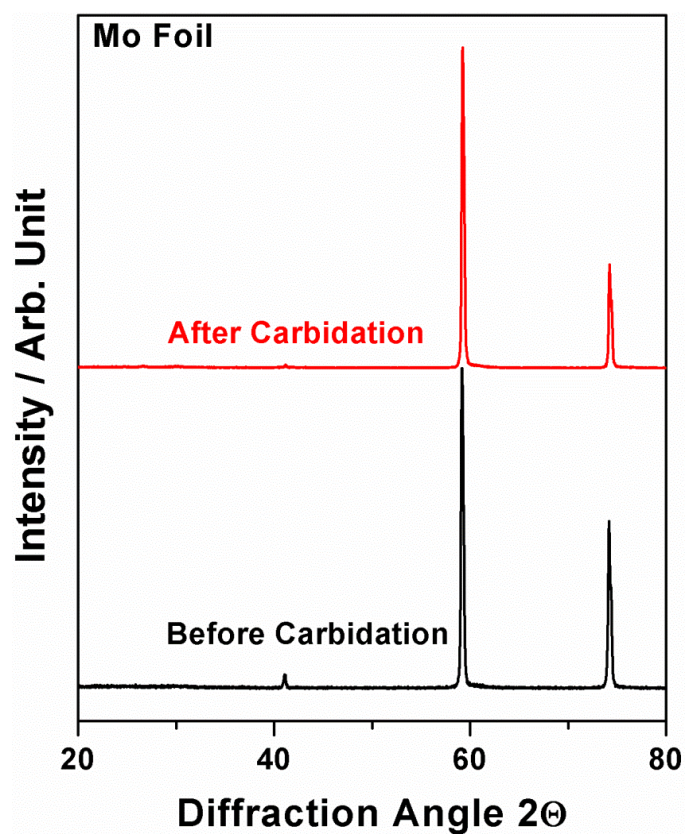

**Figure S3.** XRD spectra of Mo foil before and after carburization process.

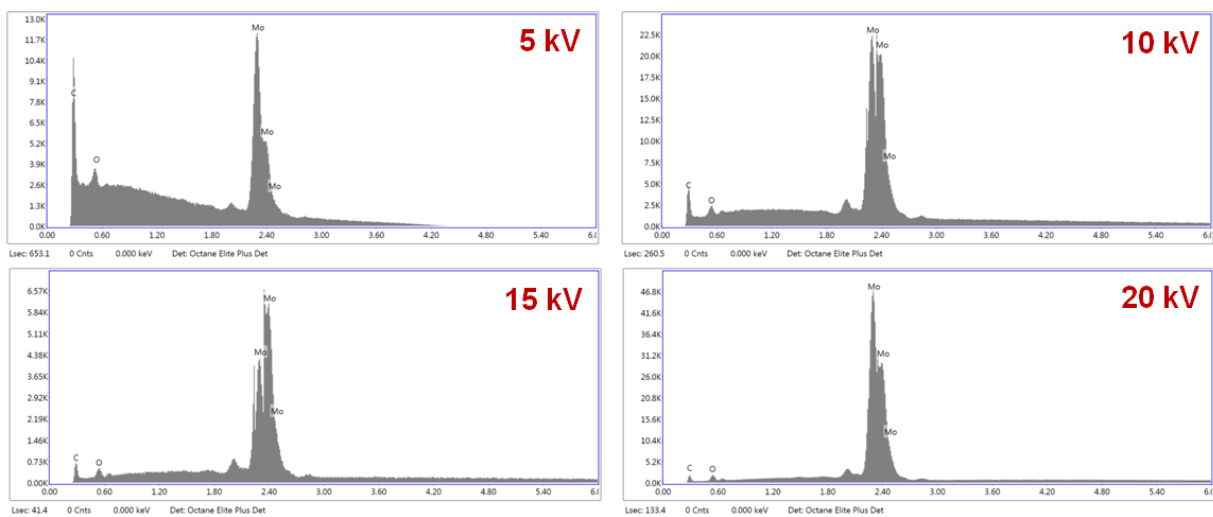

**Figure S4.** SEM-EDX analysis of as prepared  $\text{Mo}_2\text{C}$  foil with different electron energy source.

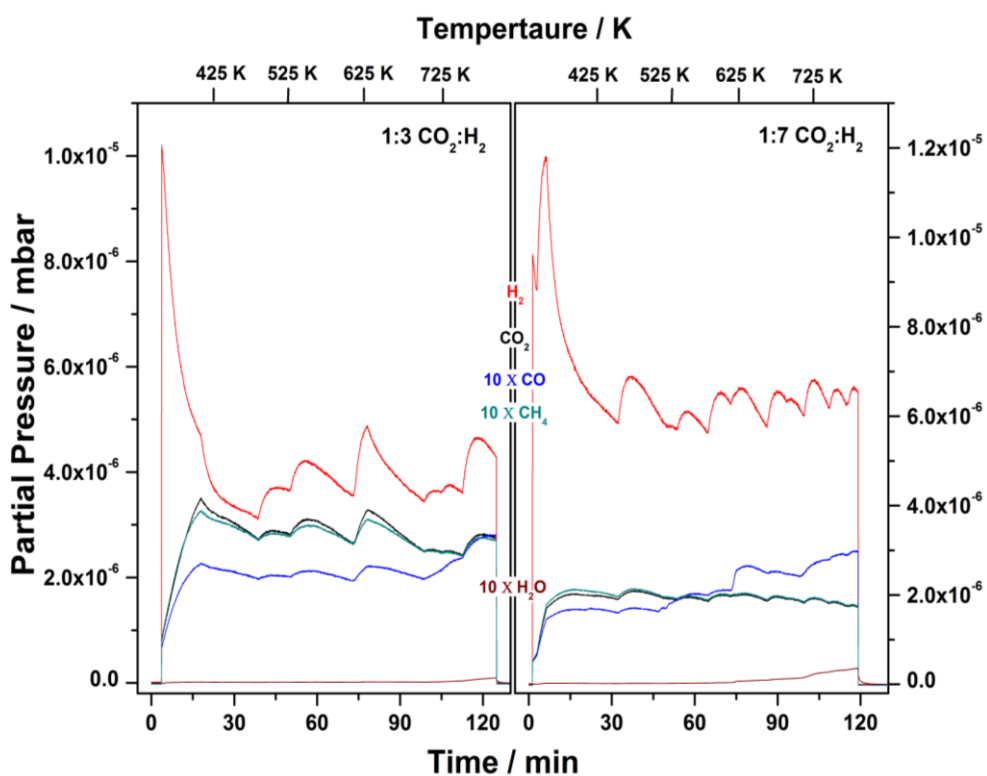

**Figure S5.** Mass spectrometry analysis of CO<sub>2</sub> hydrogenation on Mo<sub>2</sub>C foil with different ratios of CO<sub>2</sub>:H<sub>2</sub> (1:3) and CO<sub>2</sub>:H<sub>2</sub> (1:7) at various temperatures. It is to be noted that CO<sub>2</sub>, CO and CH<sub>4</sub> shows very similar intensity pattern, mainly due to secondary fragments (CO for CO<sub>2</sub>) or same mass species but originating from different sources (16 O from CO<sub>2</sub> and CO, and CH<sub>4</sub>). Hence it is difficult to ascertain the reaction details from this data alone. However, more CO generation is observed with 1:7 compositions at high temperatures. Fluctuations in the intensity pattern are due to opening of leak valve to maintain the same pressure during reaction measurements.

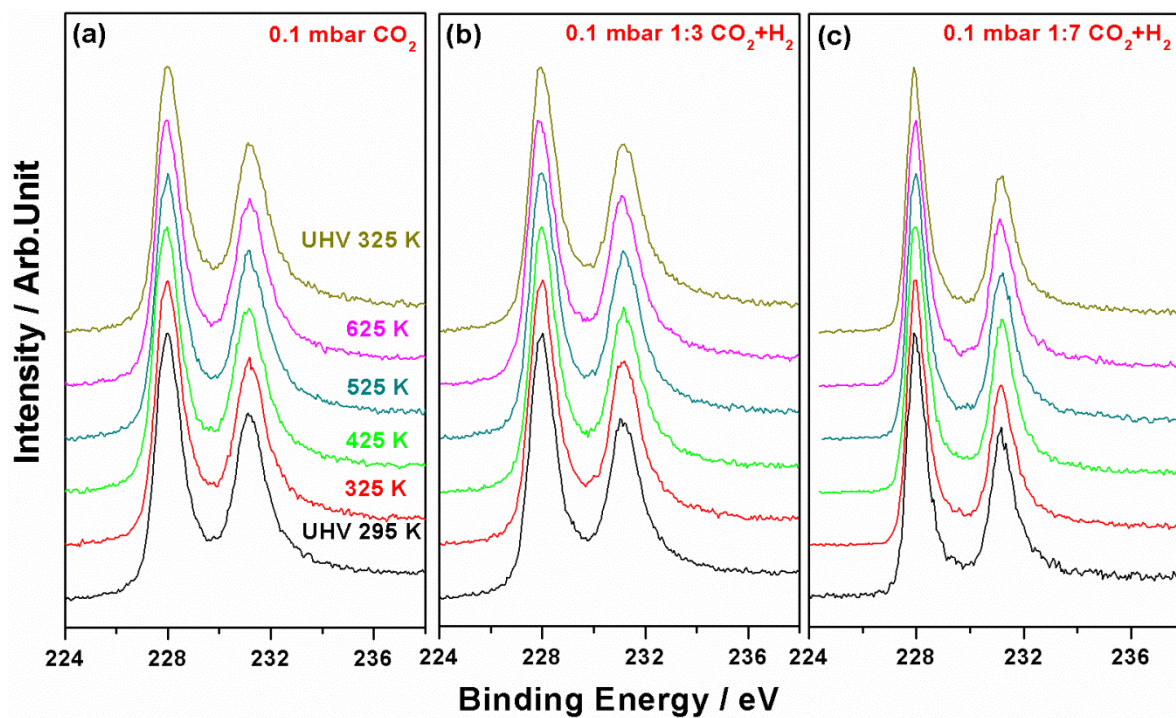

**Figure S6.** Mo 3d spectra of CO<sub>2</sub> hydrogenation on Mo<sub>2</sub>C foil with different ratios a) Alone CO<sub>2</sub> b) CO<sub>2</sub>:H<sub>2</sub> 1:3 and c) CO<sub>2</sub>:H<sub>2</sub> 1:7 at various temperatures.

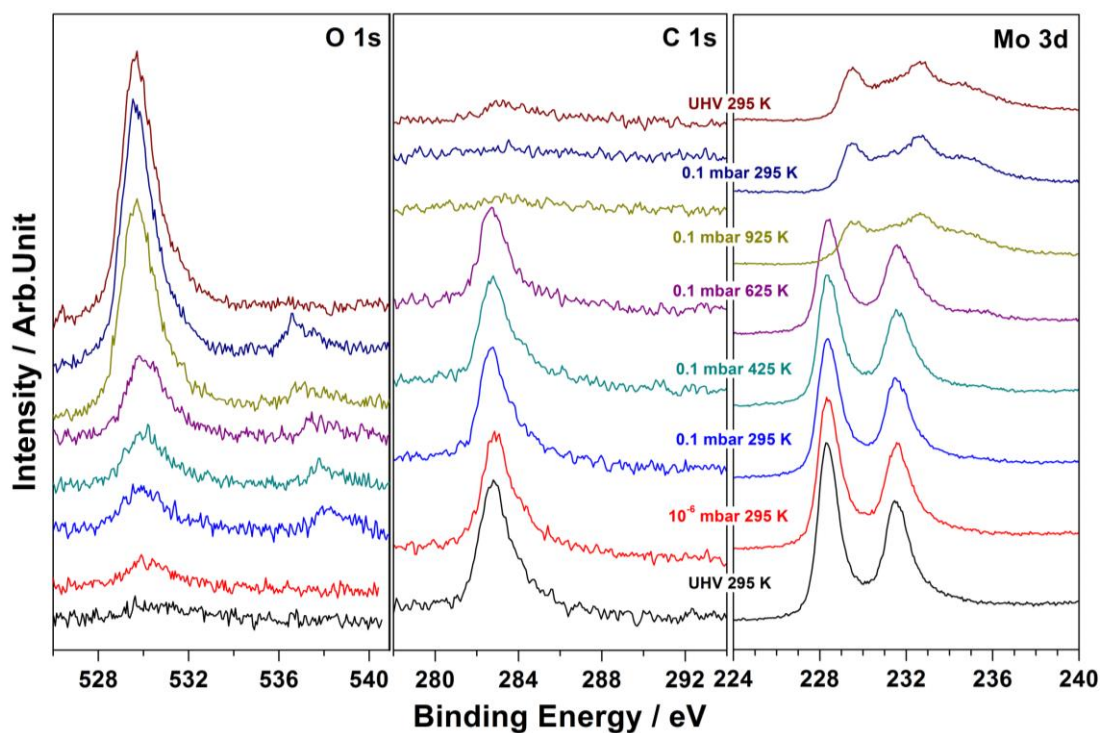

**Figure S7.** NAPXPS spectra of Mo<sub>2</sub>C foil oxidation at 0.1 mbar O<sub>2</sub> with various temperatures.
